# Supplementary material for: Phototransformation of tetrazoline oxime ethers: photoisomerization vs. photodegradation
Source: Royal Society of Chemistry journal article supplement (doi:10.1039/c5ra24936h), 2016-01-01
Supplement: c5ra24936h1.pdf [file c5ra24936h1.pdf]

## Supporting information

### Phototransformation of Tetrazoline oxime ethers: Photoisomerization *vs* photodegradation

Maxime Fréneau,<sup>a,b</sup> Pascal de Sainte Claire<sup>a,c</sup>, Norbert Hoffmann,<sup>b</sup> Jean-Pierre Vors,<sup>d</sup> Julie Geist,<sup>d</sup> Michel Euvrard,<sup>d</sup> Claire Richard,<sup>\*a,e</sup>

<sup>a</sup> Equipe Photochimie CNRS, UMR 6296, ICCF, F-63178 Aubière, France.

<sup>b</sup> CNRS, Université de Reims Champagne-Ardenne, ICMR, Equipe de Photochimie, UFR Sciences, B.P. 1039, 51687 Reims, France

<sup>c</sup> Université Clermont Auvergne, ENSCCF, Institut de Chimie de Clermont-Ferrand, BP 10448, 63000 Clermont-Ferrand, France.

<sup>d</sup> Bayer S.A.S, 14 Impasse Pierre Baizet, 69263 Lyon, France

<sup>e</sup> Université Clermont Auvergne, Université Blaise Pascal, Institut de Chimie de Clermont-Ferrand, BP 10448, F-63000 CLERMONT-FERRAND, FRANCE

## 1. Irradiations

### 1.1 Emission spectrum of polychromatic tubes

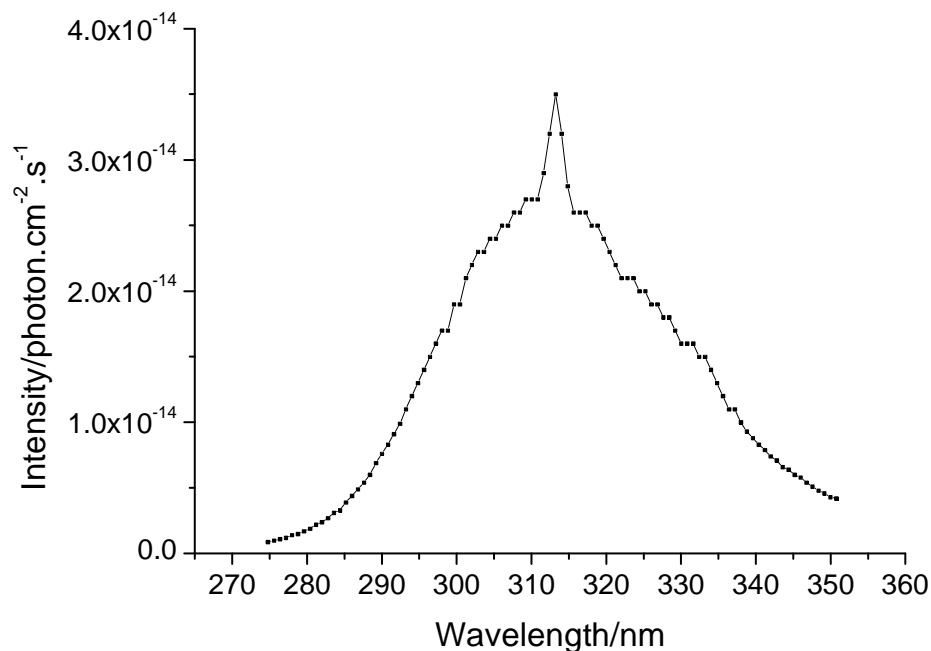

**Figure SI-1:** Emission spectrum of polychromatic tubes

### 1.2 Polychromatic quantum yields

Polychromatic quantum yields were obtained using the following expression,

$$\Phi = \frac{R_{1-Z}}{R_{Ia}} \quad (eq. 1)$$

where  $R_{1-Z}$  is the rate of photolysis of **1-Z**,  $R_{Ia}$  is the rate of light absorption,

$$R_{Ia} = \sum_{280}^{350} (1 - 10^{-A_{\lambda}}) I_{\lambda} l^{-1} \Delta\lambda \quad (eq. 2)$$

In equation 2,  $A_{\lambda}$  is the absorption of the sample and  $I_{\lambda}$  is the photon fluence rate at wavelength  $\lambda$  at the front face of the reactor, as measured with an Ocean Optics spectroradiometer.  $\Delta\lambda$  was set at 5 nm and  $A_{\lambda}$  and  $I_{\lambda}$  were averaged within the 5-nm wavelength ranges.  $l$  is the averaged path length.  $R_{Ia}$  was found to be  $2.25 \times 10^{-6}$  Einstein/L/s.

## 2. Formation and identification of 1-E

### 2.1 UPLC analysis of irradiated 1-Z at very low conversion extent

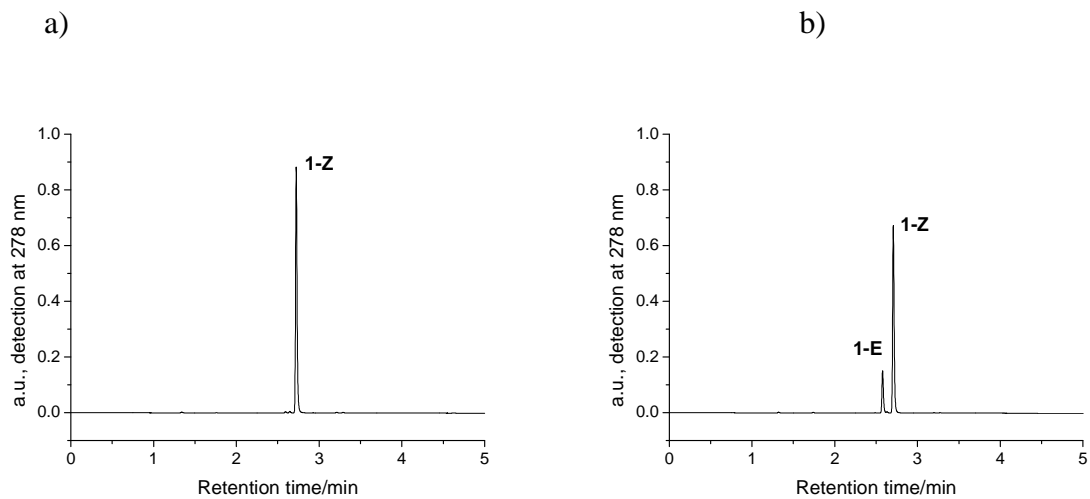

**Figure SI-2:** Evolution of the chromatogram of **1-Z** during its polychromatic irradiation in acetonitrile. **a)** Only the **Z** isomer is present initially. **b)** After 60 s, **1-E** is the only photoproduct

## 2.2 HPLC-MS of 1-E

The HPLC-MS data below confirmed that **1-Z** and **1-E** show the same m/z.

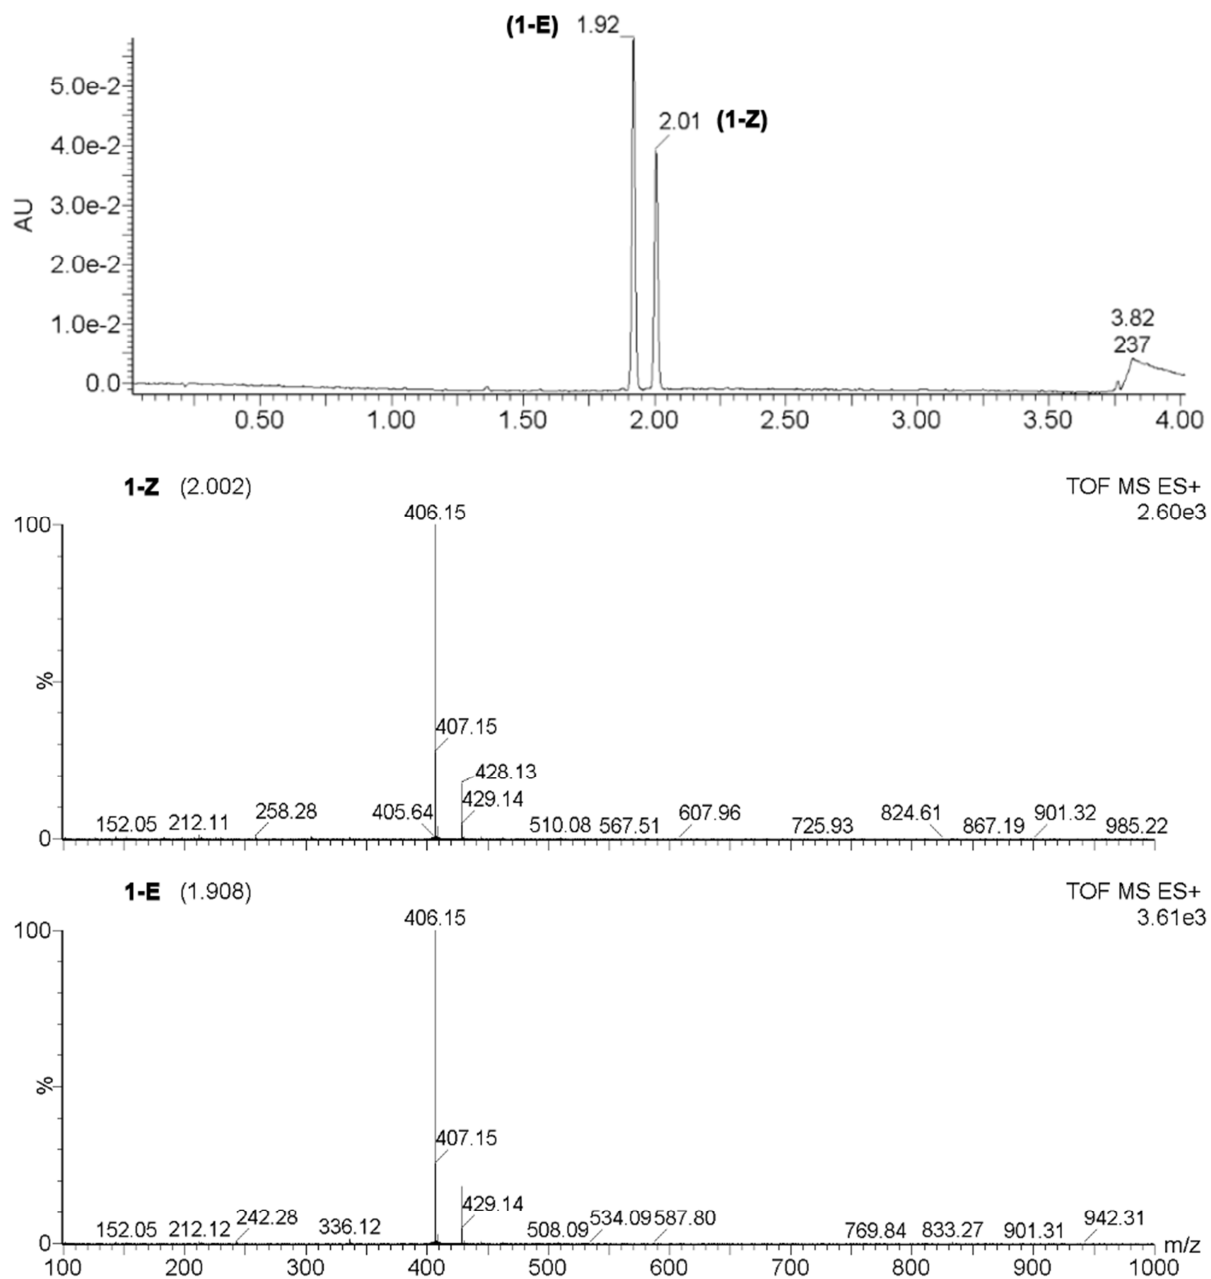

**Figure SI-3:** HPLC-MS data of a mixture of **1-Z** (retention time 2.01 min) and **1-E** (retention time 1.98 min) obtained after irradiation of **1-Z**.

### 2.3 UV spectra of 1-Z and 1-E

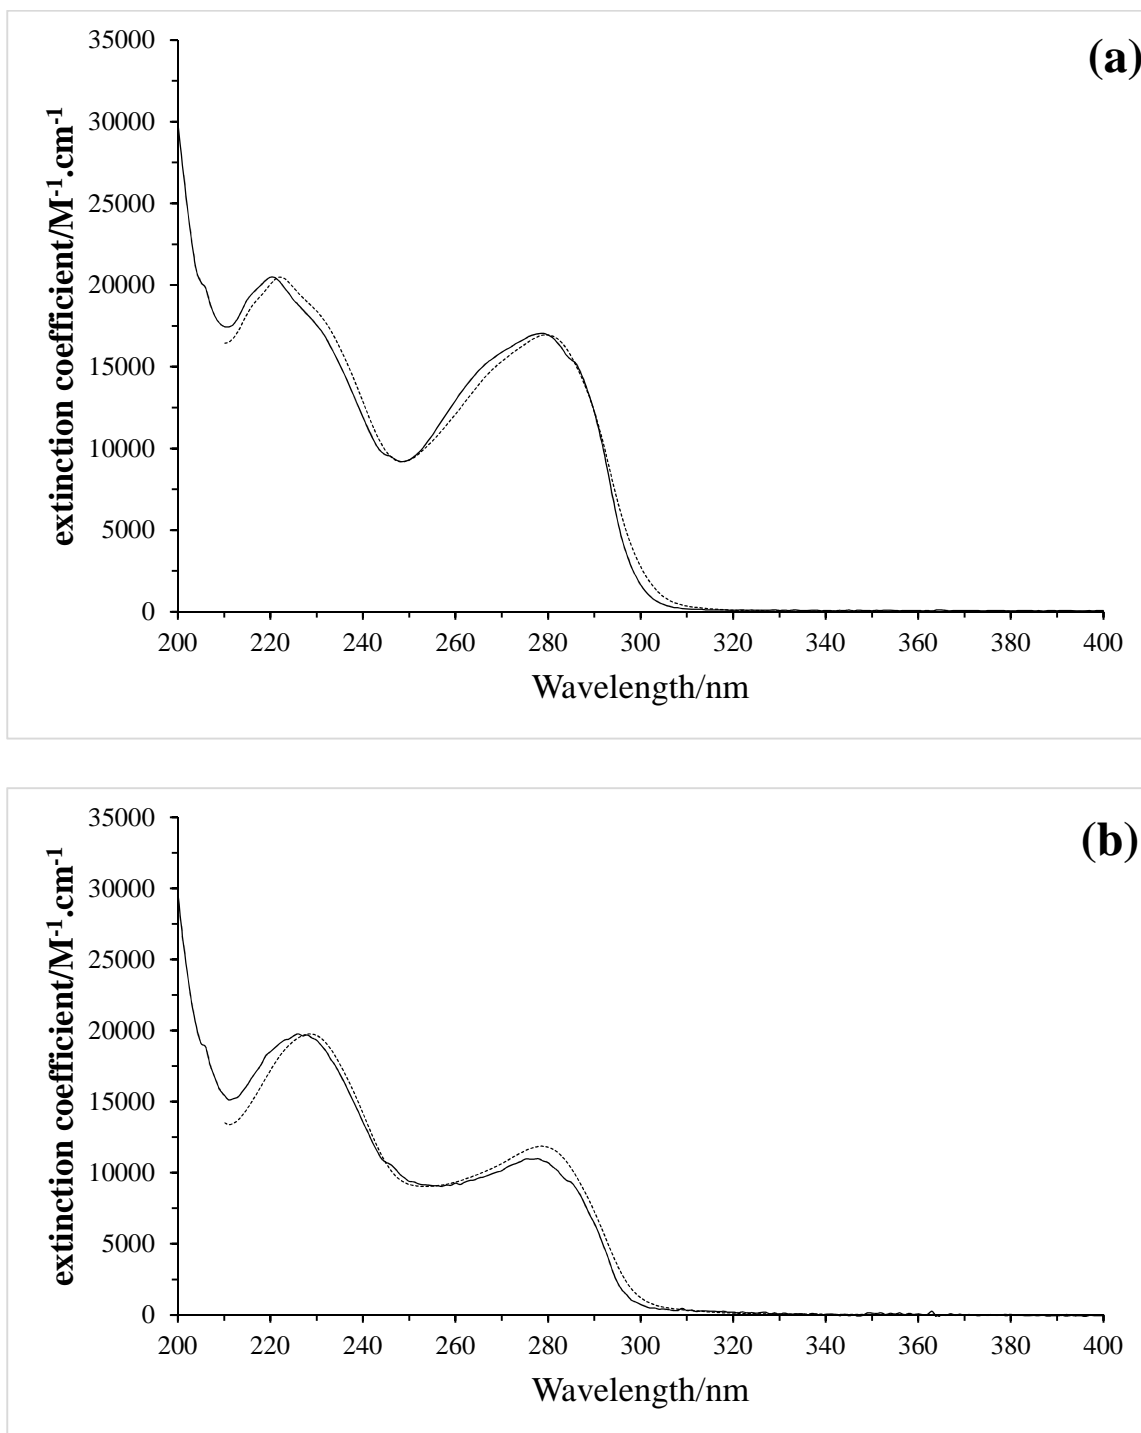

**Figure SI-4:** UV spectra of isomers **1-Z** (a) and **1-E** (b). Comparison of spectra obtained by HPLC (dotted line) with those obtained by conventional UV spectrophotometry (solid line) for **1-Z** and after subtraction for **1-E**.

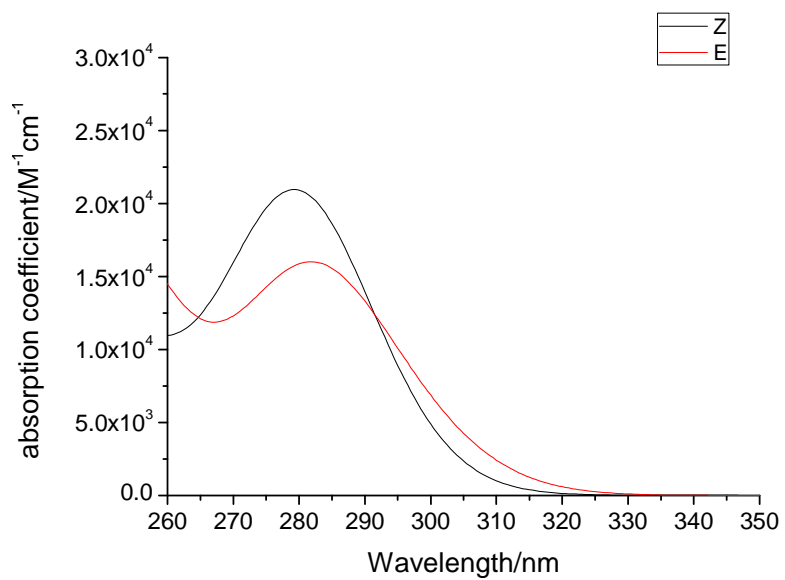

**Figure SI-5:** Theoretical absorption spectra of **1-Z** and **1-E**

### 3. Irradiation of 1-Z in polychromatic light

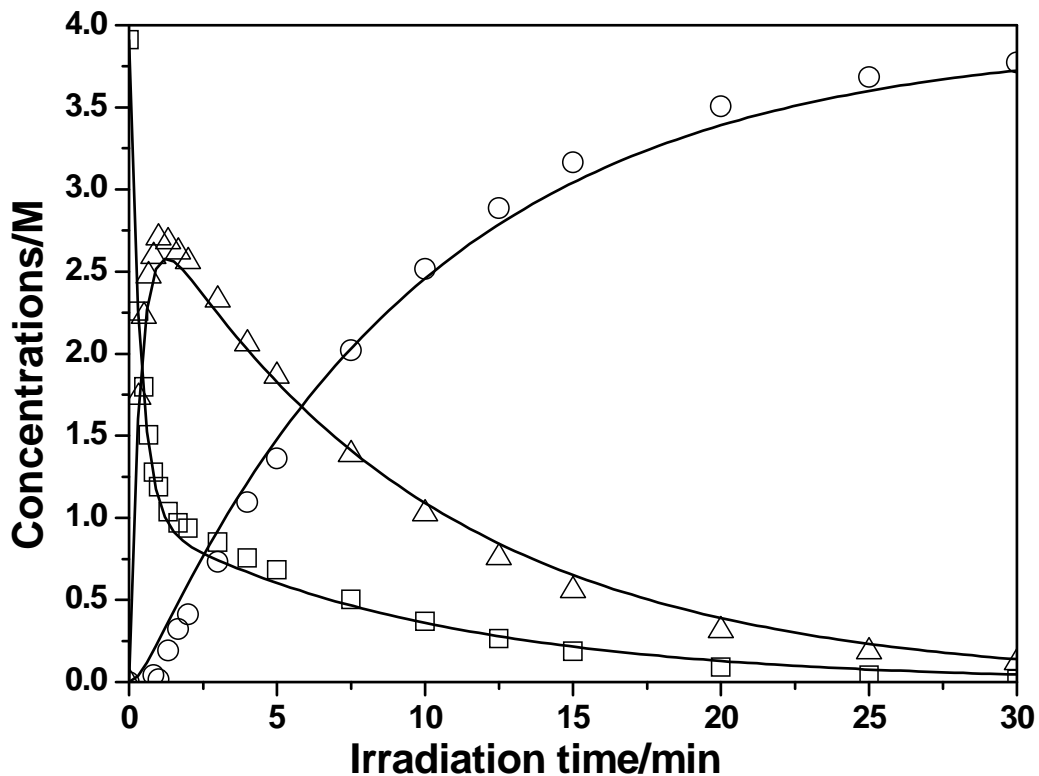

**Figure SI-6:** Consumption profile of **1-Z** (□) and formation profile of **1-E** (Δ), and degradation photoproducts (○) upon polychromatic irradiation. The irreversible photodegradation is obtained by subtracting the amounts of **1-Z** and **1-E** from the initial concentration of **1-Z**. Solid lines were obtained by the fitting procedure.

#### 4. Irradiation of 2-Z in polychromatic light

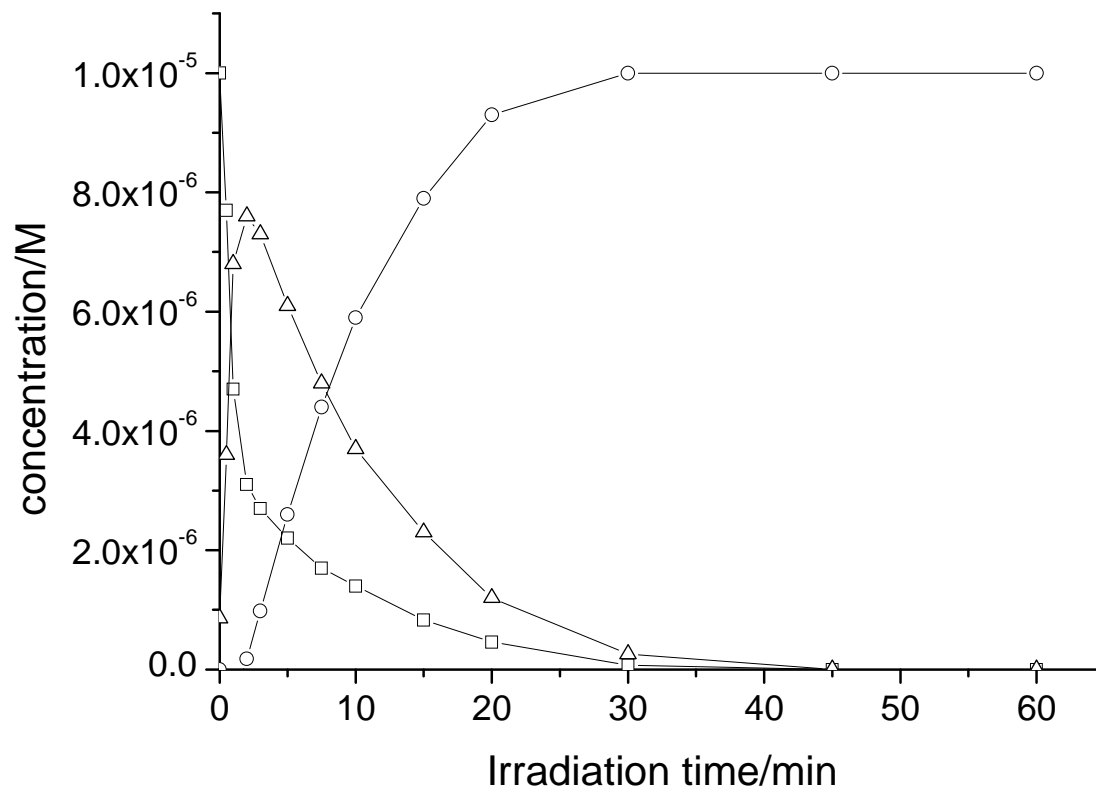

**Figure SI-7:** Consumption profile of **2-Z** (□) and formation profile of **2-E** (Δ), and degradation photoproducts (○) upon polychromatic irradiation. The irreversible photodegradation is obtained by subtracting the amounts of **2-Z** and **2-E** from the initial concentration of **1-Z**. Solid lines were obtained by the fitting procedure.



## 5. UV spectra of 4 and 5

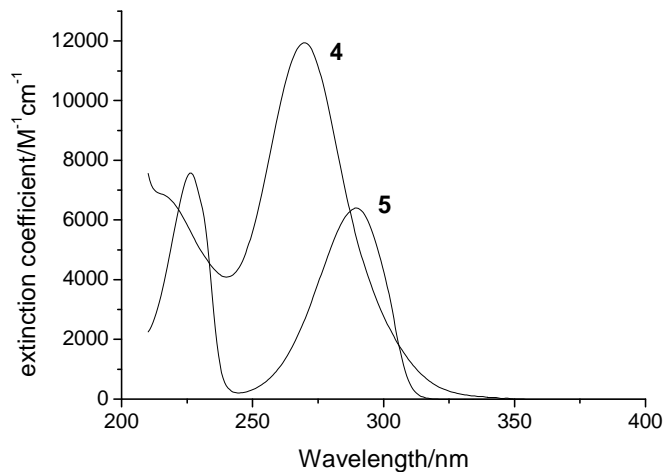

**Figure SI-8:** UV spectra of **4** and **5** in acidic water -acetonitrile mixture (55:45, v/v)

## 6. Calculation of the electronic absorption spectra of species 4 and 6

Time-Dependent Density Functional Theory (TD-DFT) calculations were performed at the B3LYP/6-31(d,p) level to obtain the electronic absorption spectra of species **4** and **6**. These are shown below in the most stable conformation.

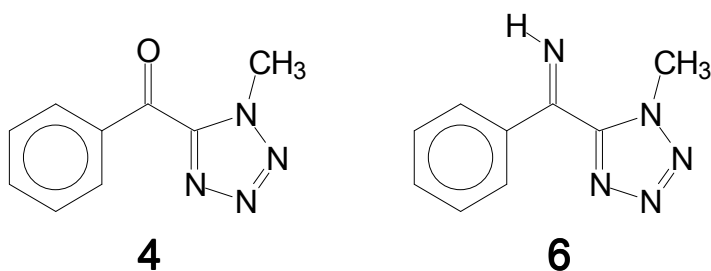

The theoretical UV absorption spectra are shown below. This Figure shows that both species **4** and **6** absorb in the same regions at ~230 nm and ~280 nm. However, the carbonyl species **4** is a stronger UV absorbant (x3) than the imine **6** at 280 nm.

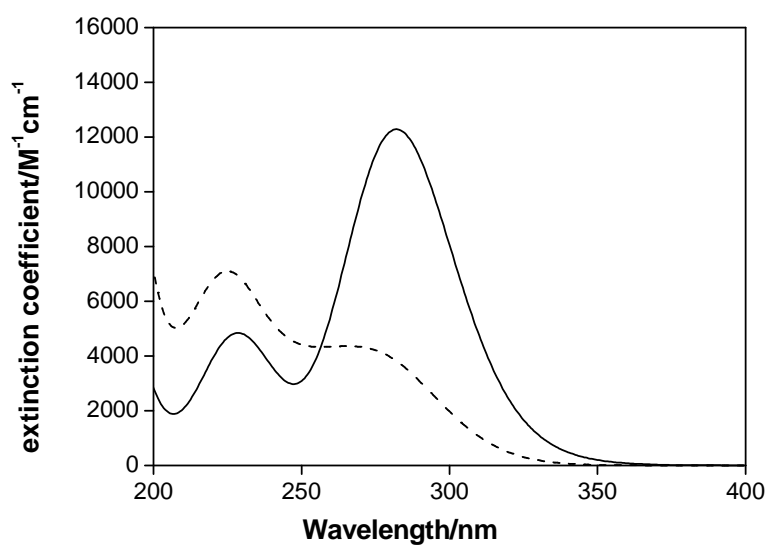

**Figure SI-9:** Theoretical absorption spectra of **4** (solid line) and **6** (dotted line)

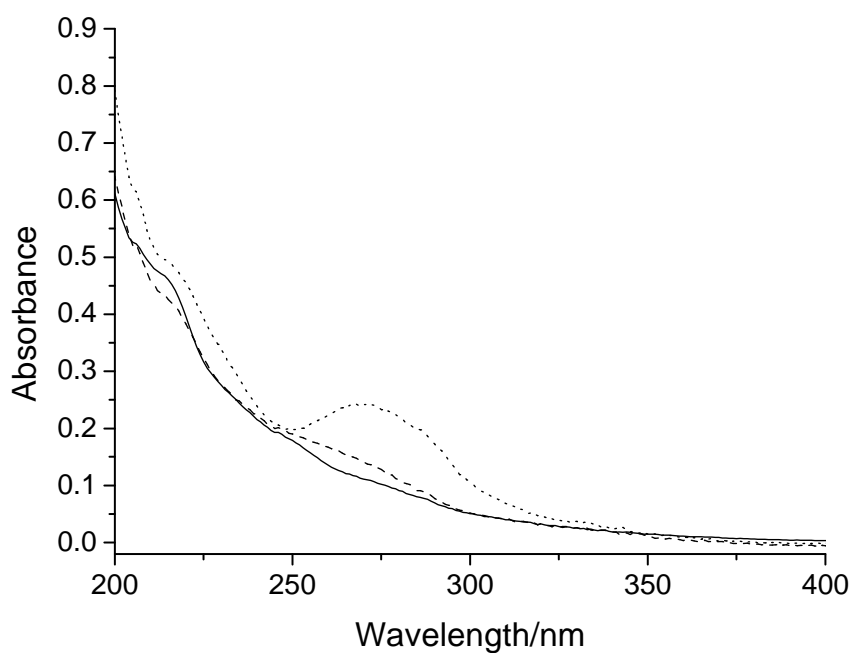

**Figure SI-10:** Changes of the absorption spectrum of an irradiated solution of **1-Z** upon acidification. Solid line: pure acetonitrile; dashed line: addition of pure water; dotted line: addition of acidified water with orthophosphoric acid (0.1%)

## 6. Data on 3-Z and 3-E

### 6.1 Photoisomerization of 3-Z into 3-E

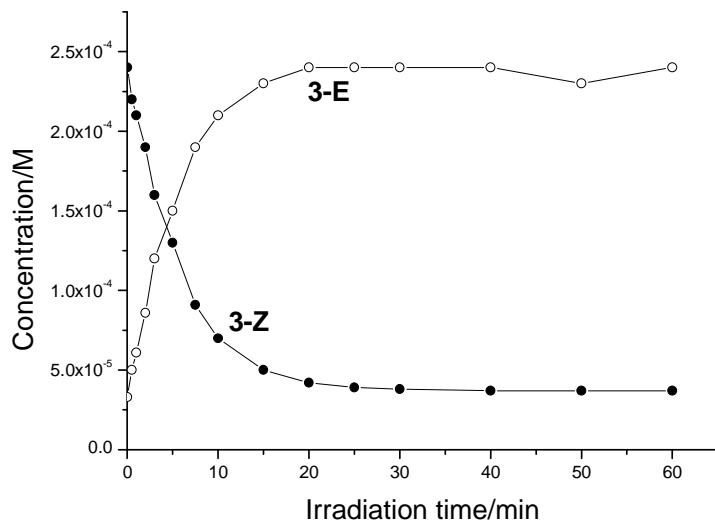

**Figure SI-11:** Concentrations evolution of isomers **3-Z** and **3-E** during the polychromatic irradiation of **3-Z**. After establishment of the photostationary state,  $[3\text{-E}]/[3\text{-Z}] = 6.2$ .

## 6.2 Absorption spectra of 3-Z and 3-E

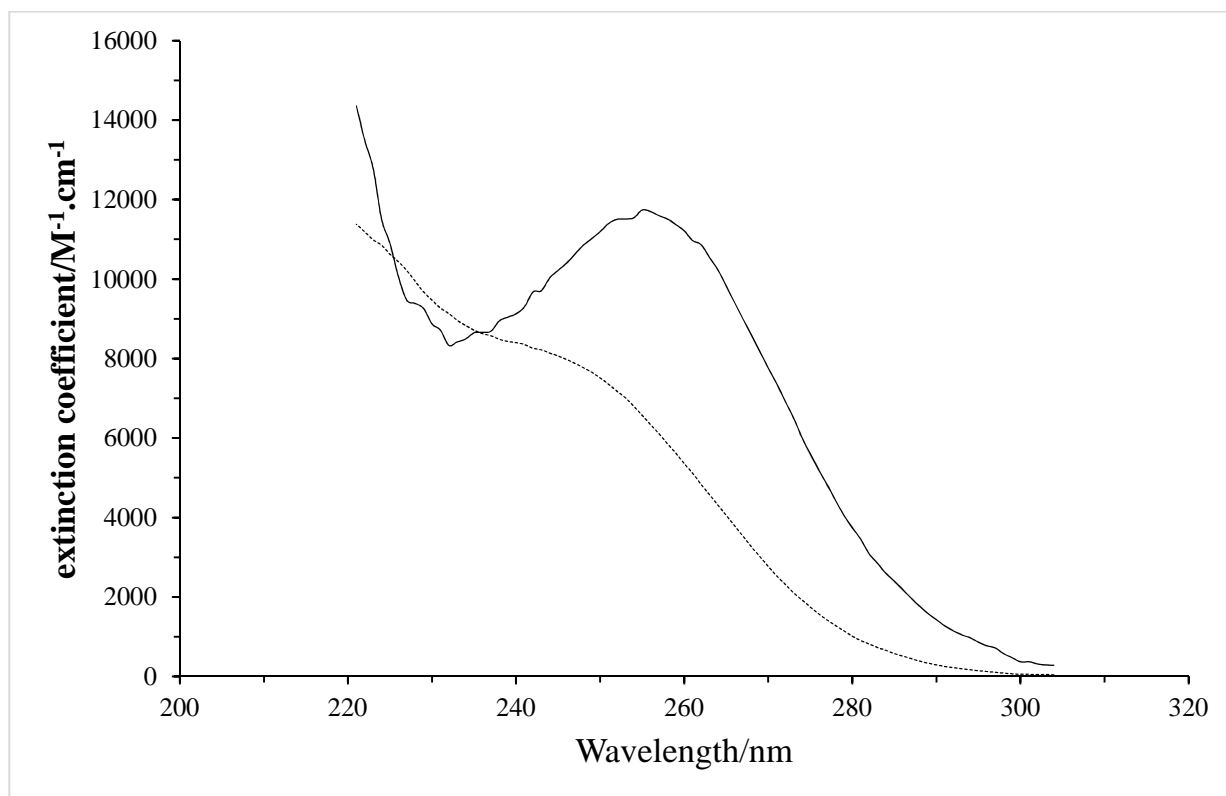

**Figure SI-12:** Experimental absorption spectra of isomers **3-Z** (solid line) and **3-E** (dotted line), determined by spectrum subtraction.

## 7. MS data on 7 and 8

a)

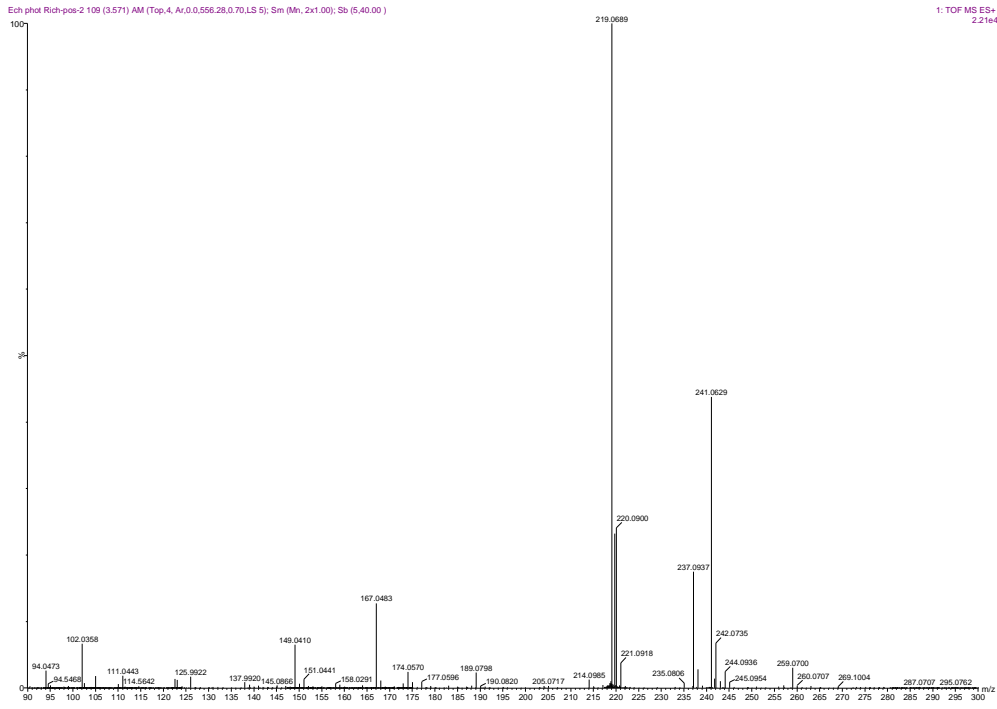

b)

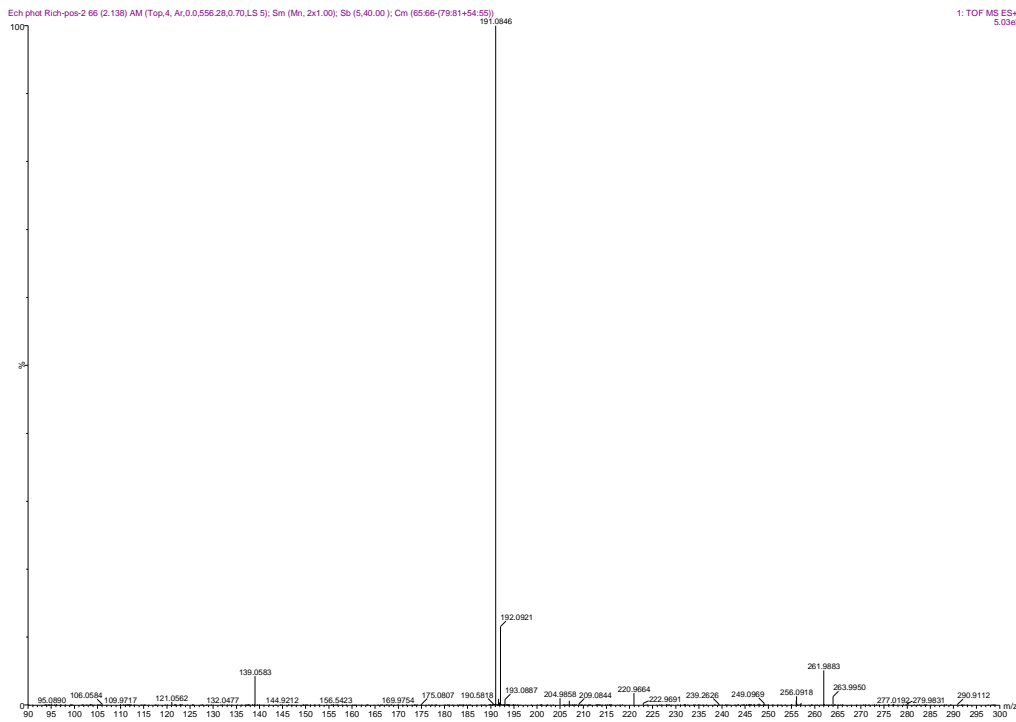

Figure SI-13: MS data of 7 (a) and 8 (b)

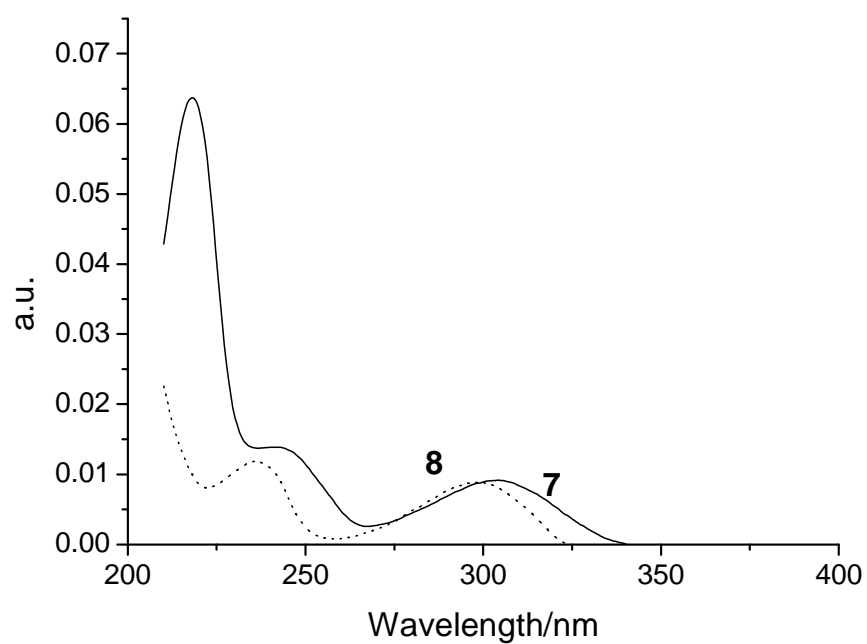

**Figure SI-14:** Experimental UV spectra of **7** (solid line) and **8** (dotted line)

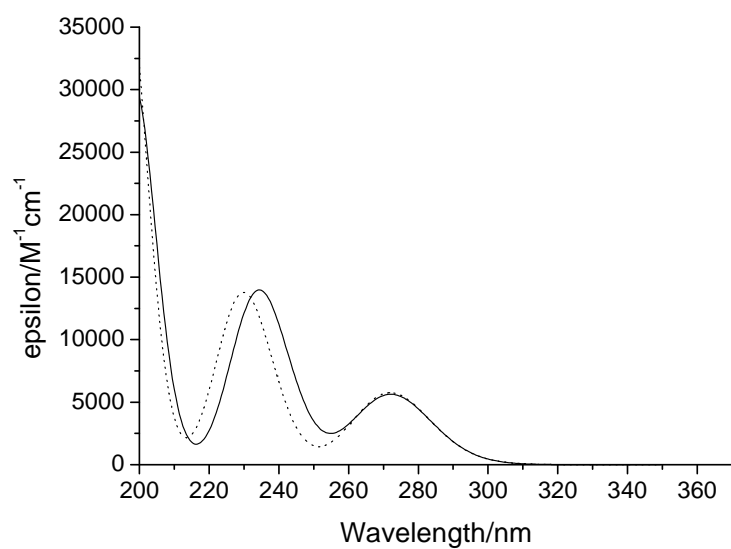

**Figure SI-15:** Theoretical UV spectra of **8** (dotted line) and **M8** (solid line)

## 8. Phototransformation of 4 in polychromatic irradiation

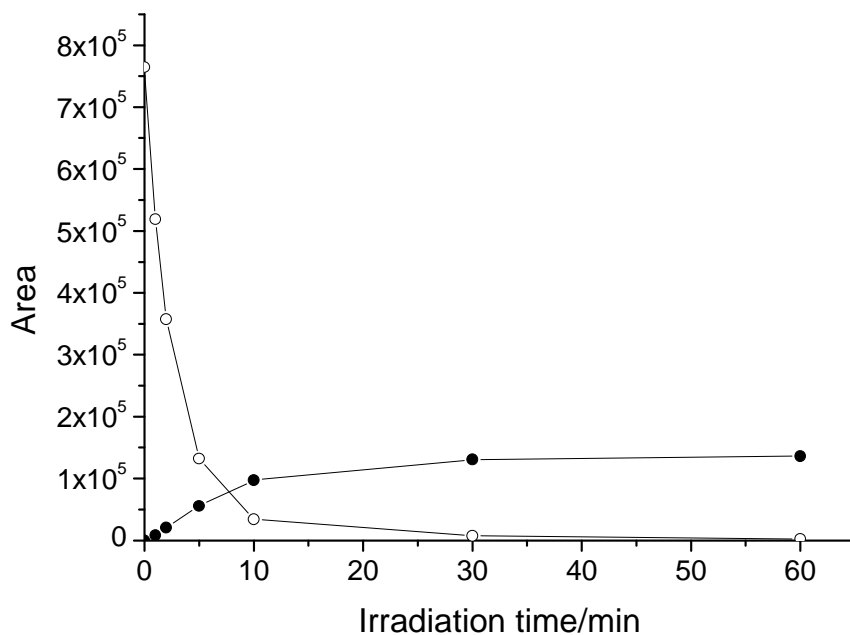

**Figure SI-16:** Concentration profile of **4** (○) during its polychromatic irradiation. Only one photoproduct (●) is detected by HPLC.

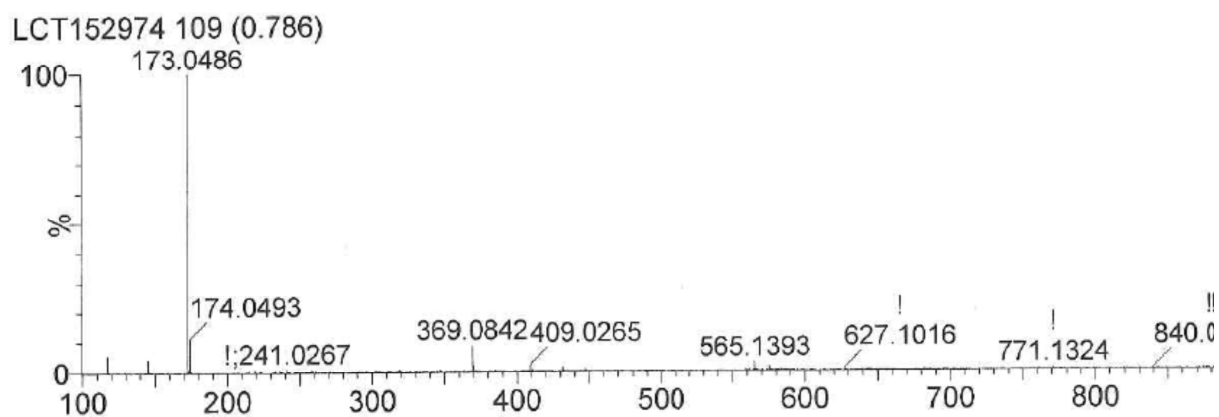

**Figure SI-17:** MS data of photoproduct **9** in ES<sup>-</sup>, m/z=173.

## 9. Phototransformation of M8 in polychromatic irradiation

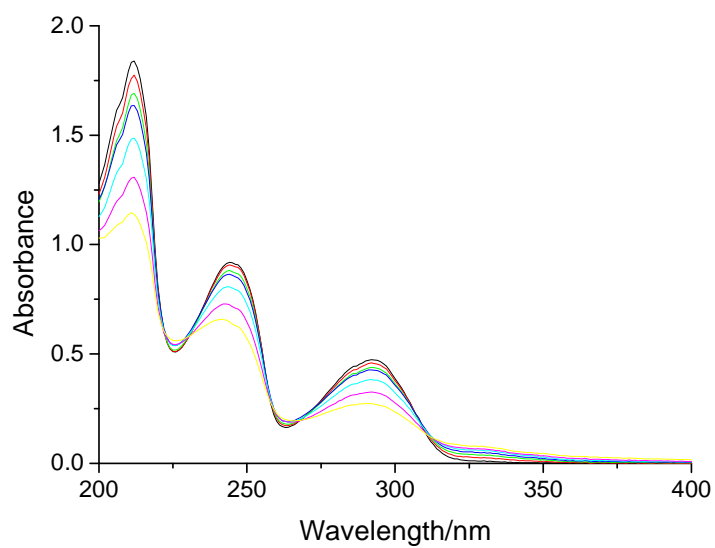

**Figure SI-18:** Absorbance evolution of a solution of **M8** in acetonitrile during its polychromatic irradiation. Irradiation times: 0, 5, 10, 15, 25, 40, 60 min
